# Supplementary material
Source: MDPI journal article supplement (https://www.mdpi.com/2073-4441/10/11/1535)
Supplement: s1 [file s1]

# Supplementary Materials:

**Table S1.** SWAT parameters calibrated for the monthly streamflow and the TN load in the Biliuhe reservoir basin.

| Parameter    | Description                                                                               | Min value | Max value | Fitted value |
|--------------|-------------------------------------------------------------------------------------------|-----------|-----------|--------------|
| r_CN2        | SCS runoff curve number for soil condition 2                                              | −0.2      | 0.2       | 0.12         |
| v_ALPHA_BF   | Baseflow alpha factor (days)                                                              | 0         | 1         | 0.46         |
| v_GW_DELAY   | Groundwater delay (days)                                                                  | 30        | 450       | 221.10       |
| v_GWQMN      | Threshold depth of water in the shallow aquifer required for return flow to occur (mm)    | 0         | 2         | 1.17         |
| v_CH_N2      | Manning's "n" value for the main channel                                                  | 0         | 0.3       | 0.029        |
| v_CH_K2      | Effective hydraulic conductivity in main channel alluvium                                 | 0         | 500       | 79.38        |
| v_ALPHA_BNK  | Baseflow alpha factor for bank storage                                                    | 0         | 1         | 0.37         |
| r_SOL_AWC    | Available water capacity of the soil layer                                                | −0.2      | 0.4       | 0.12         |
| r_SOL_K      | Saturated hydraulic conductivity                                                          | −0.8      | 0.8       | −0.58        |
| r_SOL_BD     | Moist bulk density                                                                        | −0.5      | 0.6       | 0.46         |
| v_SFTMP      | Snowfall temperature                                                                      | −5        | 5         | 0.35         |
| v_ESCO       | Soil evaporation compensation factor                                                      | 0         | 1         | 0.98         |
| v_ERORGN     | Organic N enrichment ratio                                                                | 0         | 5         | 0.60         |
| v_NPERCO     | Nitrogen percolation coefficient                                                          | 0         | 1         | 0.093        |
| v_SDNCO      | Denitrification threshold water content                                                   | 0         | 1         | 0.97         |
| v_ANION_EXCL | Fraction of porosity (void space) from which anions are excluded                          | 0.01      | 1         | 0.87         |
| v_CANMX      | Maximum canopy storage                                                                    | 0         | 100       | 7.75         |
| v_SHALLST_N  | Concentration of nitrate in groundwater contribution to streamflow from subbasin (mg N/l) | 0         | 1000      | 136.07       |

Note: r means the parameter was multiplied by one plus a given value; v means the parameter was replaced by a given value.
